# Supplementary material for: Deciphering the Formulation Secret Underlying Chinese Huo-Clearing Herbal Drink
Source: Frontiers journal article supplement (doi:10.3389/fphar.2021.654699), 2021-04-22

## Supplementary Material

**Table S1.** The quantification of six herbs with chemical standards.

| Herbs                           | Standard compounds     | RT/min | Content (%) |      |      | Average content (%) | SD      | Standards ( $r^2$ ) |
|---------------------------------|------------------------|--------|-------------|------|------|---------------------|---------|---------------------|
| <i>Glycyrrhiza uralensis</i>    | liquiritin             | 12.3   | 0.82        | 0.78 | 0.82 | 0.81                | 0.01341 | 0.9996              |
|                                 | glycyrrhizic acid      | 33.7   | 3.98        | 2.74 | 4.17 | 3.63                | 0.44867 | 1.0000              |
| <i>Microcos paniculata</i>      | apigenin-8-C-glucoside | 31.4   | 0.03        | 0.03 | 0.03 | 0.03                | 0.00108 | 0.9999              |
| <i>Chrysanthemum morifolium</i> | chlorogenic acid       | 12.2   | 0.61        | 0.60 | 0.63 | 0.62                | 0.01001 | 0.9998              |
|                                 | luteolin-7-O-glucoside | 24.8   | 0.28        | 0.28 | 0.27 | 0.28                | 0.00325 | 0.9999              |
| <i>Lonicera japonica</i>        | chlorogenic acid       | 9.6    | 3.06        | 4.41 | 4.04 | 3.84                | 0.40487 | 0.9997              |
| <i>Prunella vulgaris</i>        | rosmarinic acid        | 15.0   | 0.26        | 0.43 | 0.23 | 0.31                | 0.06166 | 0.9998              |
| <i>Plumeria rubra</i>           | plumieride             | 19.6   | 4.41        | 3.10 | 2.42 | 3.31                | 0.58354 | 0.9999              |

### 1.1.1

#### 1.1.2 Solution preparation :

The standard stock solutions of liquiritin, glycyrrhizic acid, chlorogenic acid, luteolin-7-O-glucoside, rosmarinic acid, and plumieride were prepared in 70% methanol with a concentration of 200  $\mu\text{g/mL}$ . For sample preparation, lyophilized samples were prepared in 70% methanol with a concentration of 200  $\mu\text{g/mL}$ . The solution was diluted 200 times and then filtered through a membrane filter (0.45  $\mu\text{m}$ ) before being injected into the HPLC system for analysis.

**Methods for HPLC:**

HPLC-DAD analyses were performed using a 1200 Series HPLC-DAD system (Agilent). A C18 column (250 × 4.6 mm, 5.0  $\mu$ m, Agilent) was used for the chromatographic separations. The mobile phase consisted of 0.1% (v/v) formic acid aqueous solution (A) and acetonitrile (B), using a gradient elution of 5–20% A at 0–8 min, 20–25% A at 8–15 min, 25% A at 15–20 min, 25–40% A at 20–30 min, and 40–60% A at 30–40 min. The wavelength was set at 280 nm. The injection volume was 20  $\mu$ l, and the flow rate was kept at 1 ml/min.

**Figure S1.** The quantification of bioactive compounds in six herbs in this study by HPLC.

HPLC of standard apigenin-8-C-glucoside.

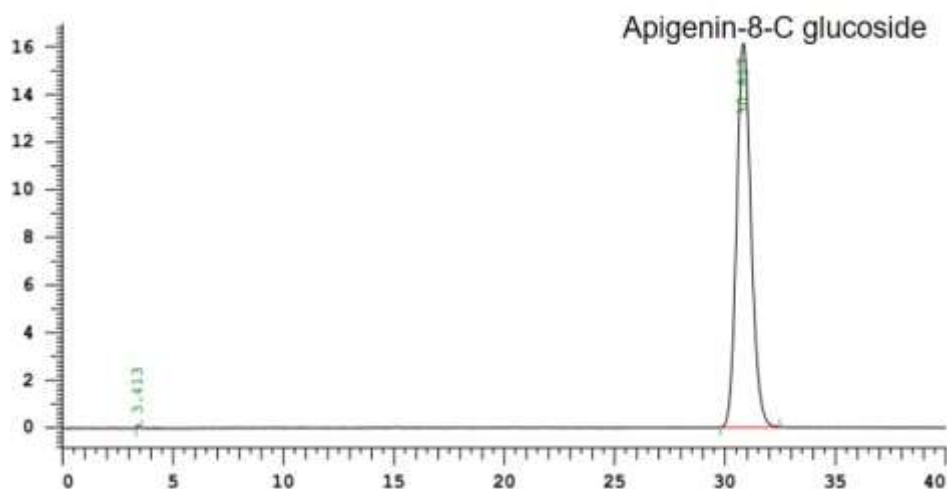

HPLC of apigenin-8-C-glucoside in the herb sample of *Microcos paniculate*.

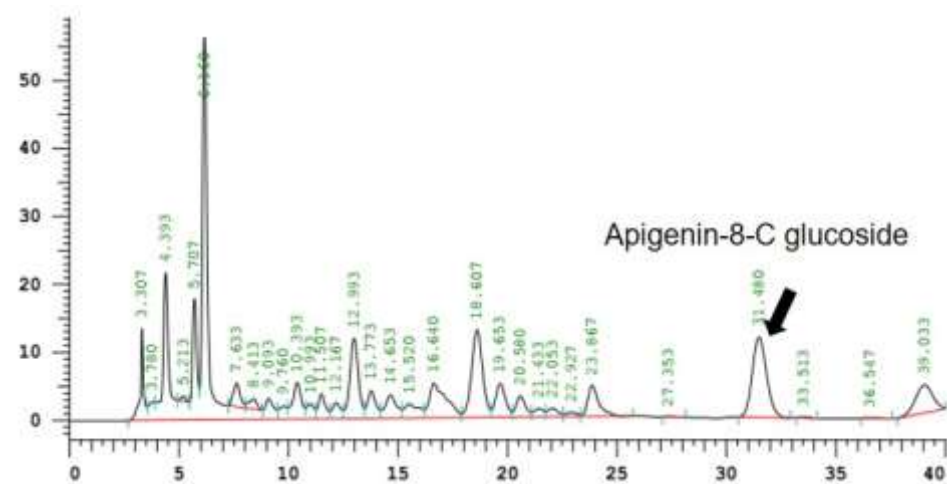

HPLC of standard glycyrrhizic acid.

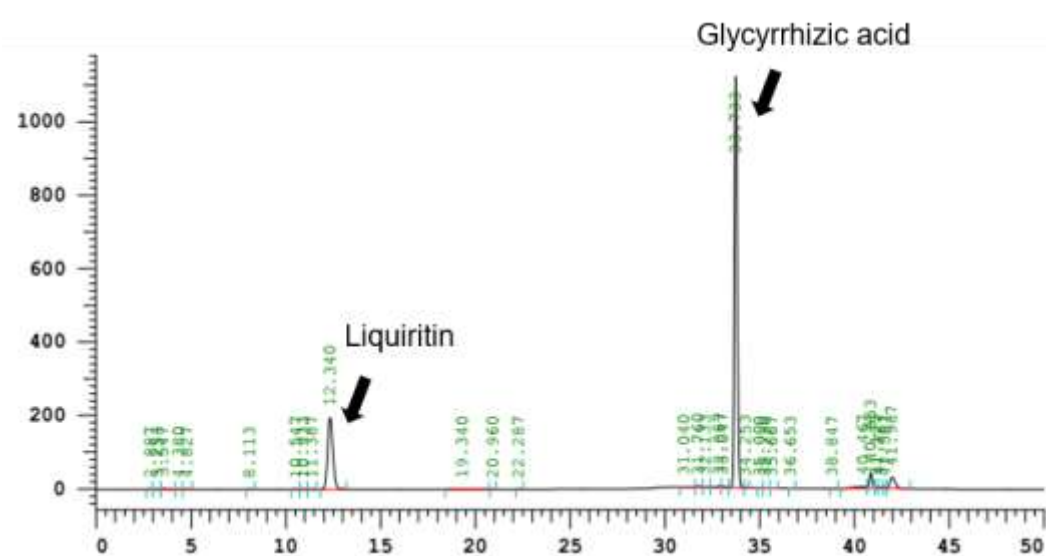

HPLC of glycyrrhizic acid in the herb sample of *Glycyrrhiza uralensis* Fisch.

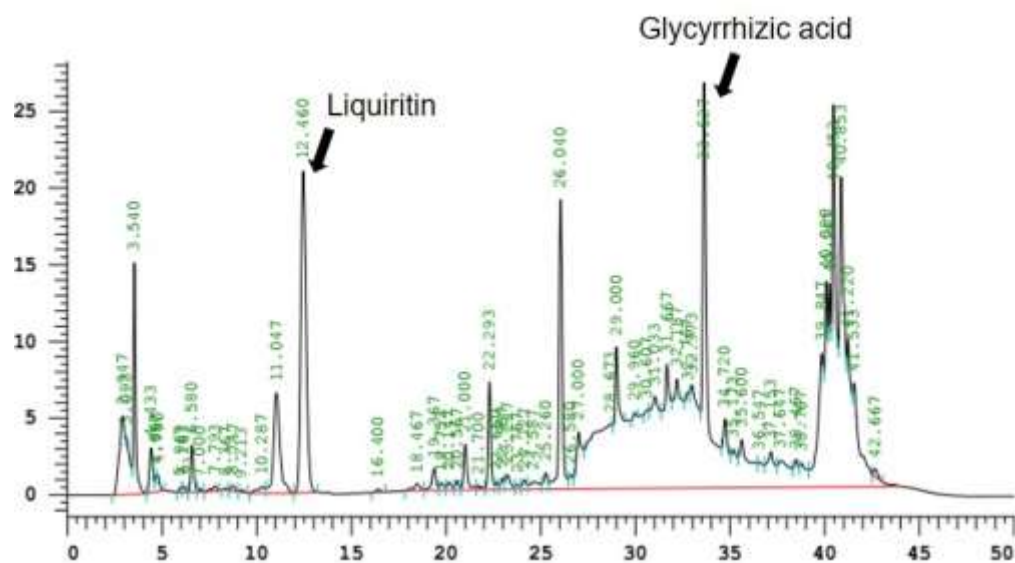

HPLC of standard chlorogenic acid and luteolin-7-O-glucoside.

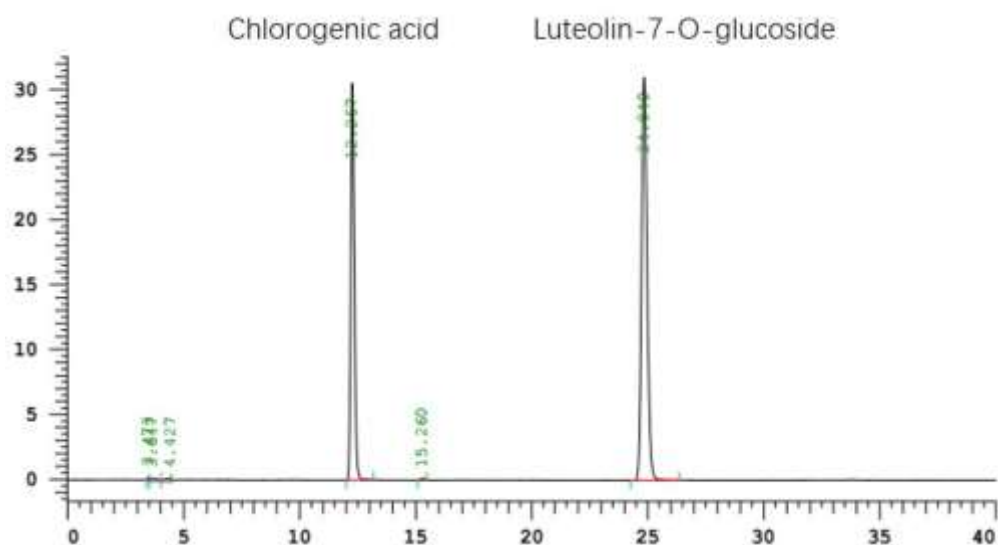

HPLC of chlorogenic acid and luteolin-7-O-glucoside in the herb sample of *Chrysanthemum morifolium* Ramat.

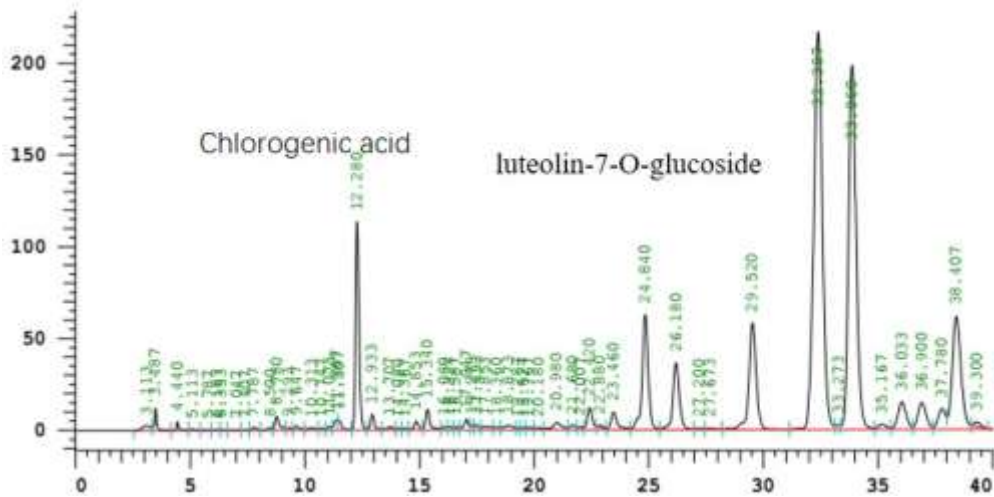

HPLC of chlorogenic acid.

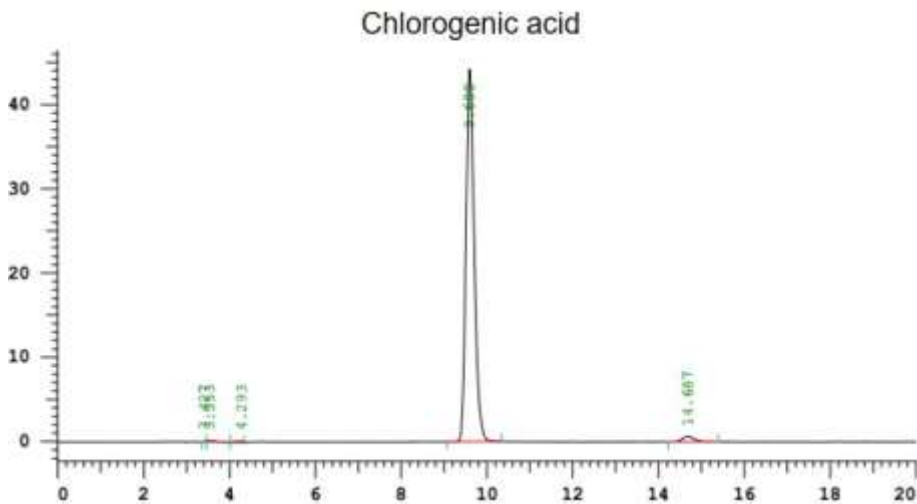

HPLC of chlorogenic acid in *Lonicera japonica* Thunb. herb sample.

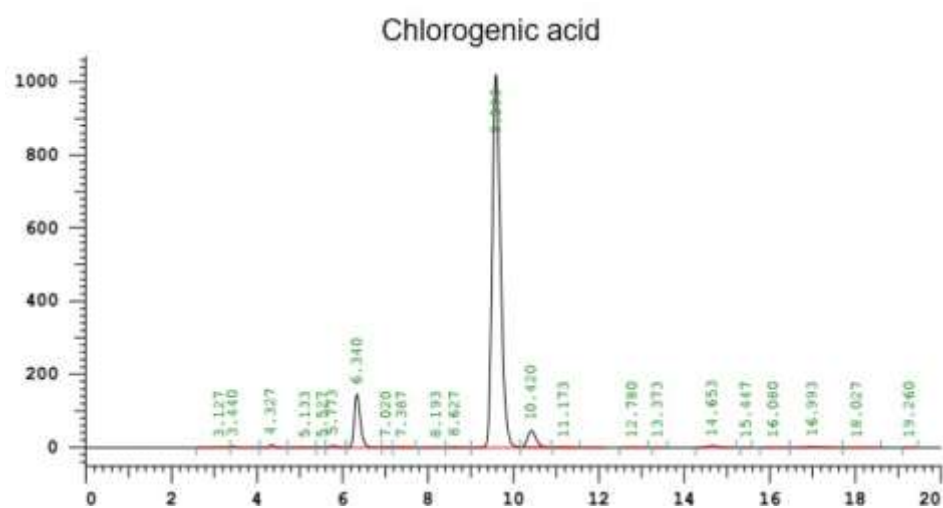

HPLC of standard plumieride.

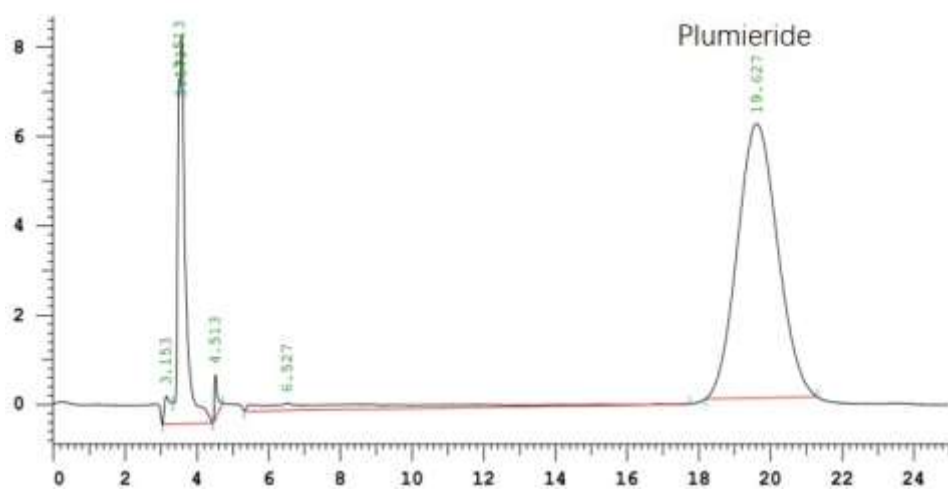

HPLC of plumieride in herb sample of *Plumeria rubra* L.

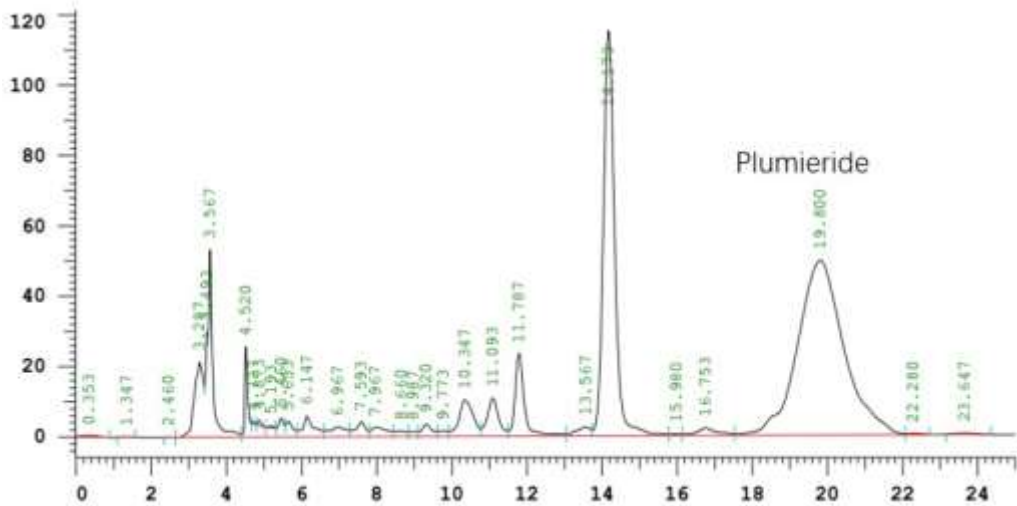

HPLC of standard rosmarinic acid.

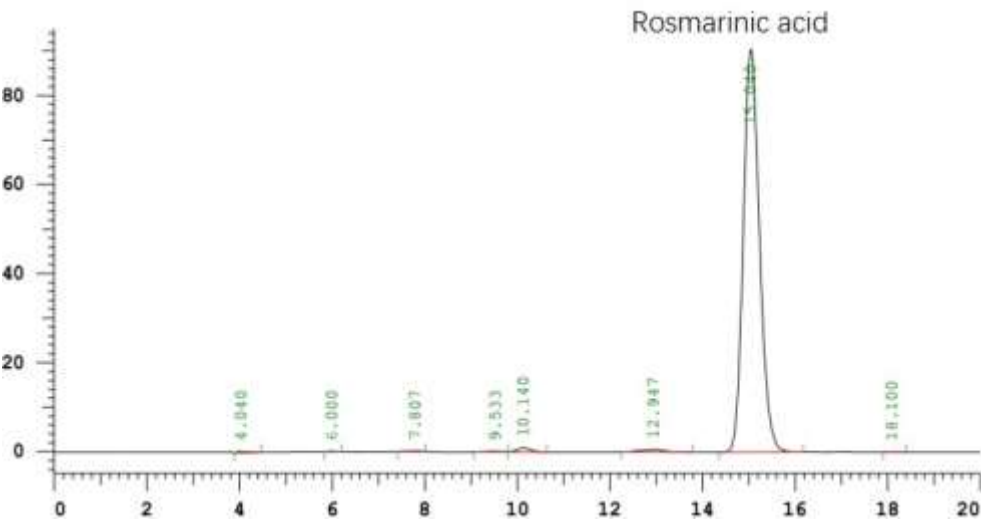

HPLC of rosmarinic acid in herb sample of *Prunella vulgaris* L.

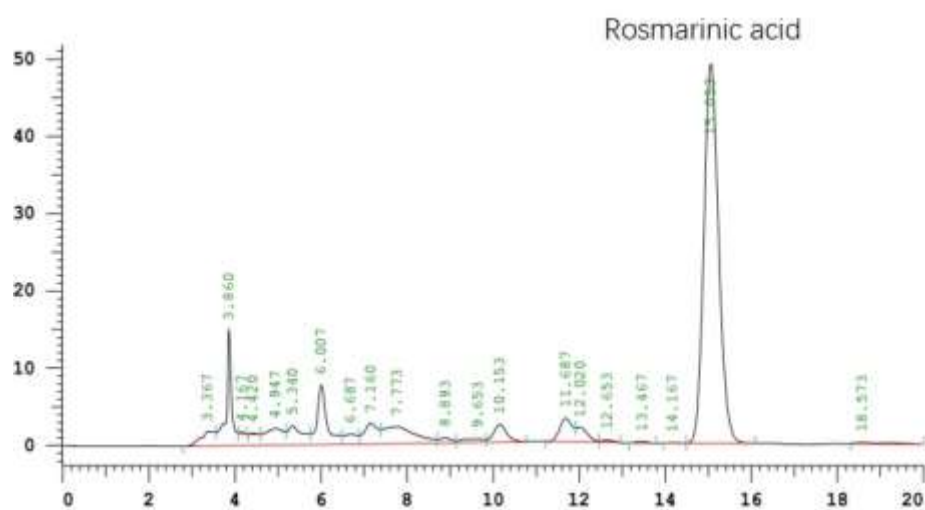

Supplement: Data_Sheet_1.pdf [file Data_Sheet_1.pdf]
